# Supplementary material for: Globular pattern formation of hierarchical ceria nanoarchitecture
Source: Research Square preprint supplement (doi:10.21203/rs.3.rs-604840/v1), 2021-06-22
Supplement: Supplementary file 1 [file 754ab4b533e6427f1f160566.pdf]

## **Supplementary Information**

### **Globular pattern formation of hierarchical ceria nanoarchitecture**

Noboru Aoyagi<sup>1\*</sup>, Ryuhei Motokawa<sup>1,2</sup>, Masahiko Okumura<sup>3</sup>, Takumi Saito<sup>1,4</sup>,

Shotaro Nishitsuji<sup>5</sup>, Tomitsugu Taguchi<sup>6</sup>, Takumi Yomogida<sup>7</sup> and Atsushi Ikeda-Ohno<sup>1</sup>

<sup>1</sup>Advanced Science Research Centre (ASRC), Japan Atomic Energy Agency (JAEA), Tokai-mura, Ibaraki 319-1195 Japan

<sup>2</sup>Materials Sciences Research Centre (MSRC), Japan Atomic Energy Agency (JAEA), Tokai-mura, Ibaraki 319-1195 Japan

<sup>3</sup>Centre for Computational Science and e-Systems, JAEA, Kashiwa, Chiba 277-0871, Japan

<sup>4</sup>Nuclear Professional School, School of Engineering, The University of Tokyo, Ibaraki 319-1188 Japan

<sup>5</sup>Graduate School of Science and Engineering, Yamagata University, Yonezawa, Yamagata 992-8510, Japan

<sup>6</sup>National Institutes for Quantum and Radiological Science and Technology, Tokai-mura, Ibaraki 319-1106, Japan

<sup>7</sup>Nuclear Science and Engineering Centre (NSEC), Japan Atomic Energy Agency (JAEA), Tokai-mura, Ibaraki 319-1195 Japan

#### **Author Note**

\*E-mail: [aoyagi.noboru@jaea.go.jp](mailto:aoyagi.noboru@jaea.go.jp)

**TABLE OF CONTENTS**

|                                                                                                        |             |
|--------------------------------------------------------------------------------------------------------|-------------|
| <b>1. A set of parameters for SAXS analysis</b>                                                        | <b>...3</b> |
| <b>2. The determination of the aggregation number (<math>n_A</math>) in a single secondary cluster</b> | <b>...7</b> |

# 1. A set of Ce<sup>IV</sup> concentration parameters for nanoclusters and ions obtained from SAXS analysis

The SAXS intensity  $I(q)$  obeys the following relationship:

$$I(q = 0) = \phi_s \cdot V_s \cdot (\rho_s - \rho_m)^2, \quad (S1)$$

where  $\phi_s$  [N.D.] is the volume fraction of the secondary clusters of our concern,  $V_s$  [cm<sup>3</sup>] is the volume of a single secondary particle,  $\rho_s$  and  $\rho_m$  are the scattering length density [cm<sup>-2</sup>], respectively. Here, the summation of the volume fraction is

$$\phi_w + \phi_s + \phi_m = 1 \quad (S2)$$

with the volume fraction of water,  $\phi_w$ , and of matrix,  $\phi_m$ , respectively. The matrix includes all of the ionic species in the system:  $\text{Ce}_m(\text{OH})_n^{(4m-n)+}$ . In the present study, we assume  $m=1$  and  $n=4$  as the representative parameters with the one having close formula to the density available for relevant species  $\rho_s$  given in Table S1. Remember that this leads to a discrimination to obtain a proper solution of the polynomial in the present case.

**Table S1.** Chemical formula, the density of the compounds, and scattering line density in the literature. 1-6

| Chemical formula                                                                                                                   | density, $D_x$ [Mg/m <sup>3</sup> ] | S.L.D. [ $\text{\AA}^{-2}$ ] |           | S.L.D. [cm <sup>-2</sup> ] |           | Ref.No. |
|------------------------------------------------------------------------------------------------------------------------------------|-------------------------------------|------------------------------|-----------|----------------------------|-----------|---------|
|                                                                                                                                    |                                     | Re                           | Im        | Re                         | Im        |         |
| H <sub>2</sub> O                                                                                                                   | 0.998 (25°C)                        | 9.52E-06                     | -3.17E-06 | 9.52E+10                   | -3.17E+10 |         |
| Ce (Metal)                                                                                                                         | 6.77                                | 4.61E-05                     | -8.23E-06 | 4.61E+11                   | -8.23E+10 |         |
| CeO <sub>2</sub>                                                                                                                   | 7.20                                | 5.13E-05                     | 7.21E-06  | 5.13E+11                   | 7.21E+10  | 1       |
| Ce <sup>III</sup> (OH) <sub>3</sub>                                                                                                | 4.57                                | 3.40E-05                     | 4.15E-06  | 3.40E+11                   | 4.15E+10  | 2       |
| Ce <sup>III</sup> (NO <sub>3</sub> ) <sub>3</sub> (H <sub>2</sub> O) <sub>6</sub>                                                  | 2.40                                | 1.97E-05                     | 9.99E-07  | 1.97E+11                   | 9.99E+09  | 3       |
| [NH <sub>4</sub> ] <sub>2</sub> [Ce <sup>IV</sup> (NO <sub>3</sub> ) <sub>6</sub> ]                                                | 2.49                                | 2.05E-05                     | 1.08E-06  | 2.05E+11                   | 1.08E+10  | 4       |
| [Ce <sup>IV</sup> <sub>2</sub> (μ <sub>2</sub> -OH) <sub>2</sub> (NO <sub>3</sub> ) <sub>6</sub> (H <sub>2</sub> O) <sub>8</sub> ] | 2.48                                | 2.02E-05                     | 1.08E-06  | 2.02E+11                   | 1.08E+10  | 5       |
| [Ce <sub>6</sub> (μ <sub>6</sub> -O)(μ <sub>3</sub> -OH) <sub>8</sub> (NO <sub>3</sub> ) <sub>8</sub> ]                            | 3.85                                | 2.93E-05                     | 2.71E-06  | 2.93E+11                   | 2.71E+10  | 6       |

The volume fraction of the second clusters,  $\phi_s$  [cm<sup>3</sup>], is

$$\phi_s := \frac{C_s M_s}{d_s} \frac{[\text{mol}][\frac{\text{g}}{\text{mol}}]}{[\frac{\text{g}}{\text{cm}^3}]}, \quad (\text{S3})$$

Where  $C_s$  [mol] is the number of the secondary clusters,  $M_s$  [g/mol] is the formula weight of the primary particle,  $d_s$  [g/cm<sup>3</sup>] is the density of the particle. In the similar manner, we have the following fractions with  $C_m$  [mol] is the number of Ce ions in the matrix medium  $M_m$  [g/mol] is the formula weight of the ionic species,  $d_m$  [g/cm<sup>3</sup>] is the density of the ionic species. Each fraction defines

$$\phi_w := \frac{\left(10^3 - \frac{C_s M_s}{d_s} - \frac{C_m M_m}{d_m}\right)}{10^3}, \quad (\text{S4})$$

and

$$\phi_m := \frac{C_m M_m}{10^3 d_m}, \quad (\text{S5})$$

where, the eq. S3 with concentration [mol/L] description provides dimensionless fraction for  $k = w, s, \text{ or } m$ :

$$\phi_i = \frac{C_k M_k}{10^3 d_k}. \quad (\text{S6})$$

In the meantime, the scattering length density  $\rho_m$  in the eq(S1) is the summation of that of water and the matrix by a factor of their volume fraction  $\chi_w$  and  $\chi_I$ , respectively. The actual matrix contains a variety of the ionic species; however, we select Ce(OH)<sub>4</sub> as a presumable species in a succinct model case with a density of  $D_x = 2.49$  [g/cm<sup>3</sup>] (Table S1). As long as we investigated, no data is available for the density of Ce(OH)<sub>4</sub>. This might be due to an extensive hygroscopic nature or the reason the determination of the hydration number

and the subsequent structures is very difficult. Therefore, we used  $D_x = 2.49 \text{ [g/cm}^3\text{]}$  that is the value for CAN, instead. Some possible density candidates are listed in Table S1, ranging from 7.20 for  $\text{CeO}_2$  to 2.40 for  $\text{Ce}^{\text{III}}(\text{NO}_3)_3(\text{H}_2\text{O})_6$ . In reality, the system of our interest has a complicated mixture of the multiple components—the optimal value for the present second cluster might exist in between.

Note that  $\rho_1$  represents a scattering length density for the corresponding ion:  $\text{Ce}(\text{OH})_4$ .

$$\rho_m = \chi_w \rho_w + \chi_i \rho_i \quad (\text{S6})$$

with

$$\chi_w = \frac{10^3 - \frac{C_s M_s}{d_s} - \frac{C_i M_i}{d_i}}{10^3 - \frac{C_s M_s}{d_s}} \quad (\text{S7})$$

and

$$\chi_i = \frac{\frac{C_i M_i}{d_i}}{10^3 - \frac{C_s M_s}{d_s}} \quad (\text{S8})$$

Total concentration of  $\text{Ce}^{4+}$  [mol/L] ions preserves;

$$\frac{C_t}{10^3} = \frac{C_s}{10^3} + \frac{C_i}{10^3} \quad (\text{S9})$$

In the case of  $C_{\text{Ce}^{\text{IV}}} = 0.05 \text{ [M]}$ , which is the second series in the Procedure and Apparatus section, we substitute  $\frac{C_t}{10^3} = 0.05 \text{ [M]}$  for the total concentration. With the eq (S7) and the eq (S8), the eq (S6) turns into

$$C_i = -\frac{d_i M_s \rho_w - \rho_m}{d_s M_i \rho_w - \rho_i} C_s + 10^3 \frac{d_i \rho_w - \rho_m}{M_i \rho_w - \rho_i} . \quad (\text{S10})$$

And thus, one obtains the following simple solvable problem with a third order polynomial of  $\rho_m$  by using parameters in Table S2 and erasing  $C_i$  and  $C_s$  from the eq (S10) in combination with the eq (S9):

$$\rho_m^3 + b_2 \rho_m^2 + b_1 \rho_m + b_0 = 0 \quad (S11)$$

**Table S2.** Parameters used for the calculation.

| Given variables | value      | unit             | remark    |
|-----------------|------------|------------------|-----------|
| $I(q=0)$        | 231.77     | $\text{cm}^{-1}$ | Exp.      |
| $V_s$           | 8.01E-11   | $\text{cm}^{-2}$ | Exp.      |
| $\rho_w$        | 9.44E+10   | $\text{cm}^{-2}$ | Exp.      |
| $\rho_s$        | 5.20E+11   | $\text{cm}^{-2}$ | Exp.      |
| $\rho_i$        | 1.88E+11   | $\text{cm}^{-2}$ | Exp.      |
| $b_2$           | -1.135E+12 |                  | numerical |
| $b_1$           | 3.67E+23   |                  | numerical |
| $b_0$           | -2.564E+34 |                  | numerical |

The numerical solutions of the eq (S11) are complex numbers with the negligible imaginary parts. Two of the solutions give the negative numbers for  $C_i$ . Therefore, an effective solution is:

$$\rho_m = 9.58\text{E}+10 \text{ cm}^{-2} \quad (S12)$$

Finally, the corresponding concentrations are

$$C_i = 6.97\text{E}-03 \text{ M}, \quad (S13)$$

and

$$C_s = 4.30\text{E}-02 \text{ M}. \quad (S14)$$

## 2. The determination of the aggregation number ( $n_A$ ) in a single secondary cluster

The volume of the secondary cluster satisfies the following relation with that of the primary cluster ( $V_p$ ), the association number ( $n$ ), and a filling factor ( $\zeta$ )

$$V_s = V_p \cdot n \cdot \zeta, \quad (\text{S15})$$

Where the maximum number allowed is  $\zeta_{\max} \sim 0.64$  for a hexagonal closest packing. In the present spherical approximation,  $V_s = (\frac{3}{4})\pi R_s^3$  and  $V_p = (\frac{3}{4})\pi R_p^3$  provide the mean aggregation number of the secondary clusters:  $\bar{n} = 27.0$ . The following scheme is an updated scheme described in the Introduction section via the present discussion.

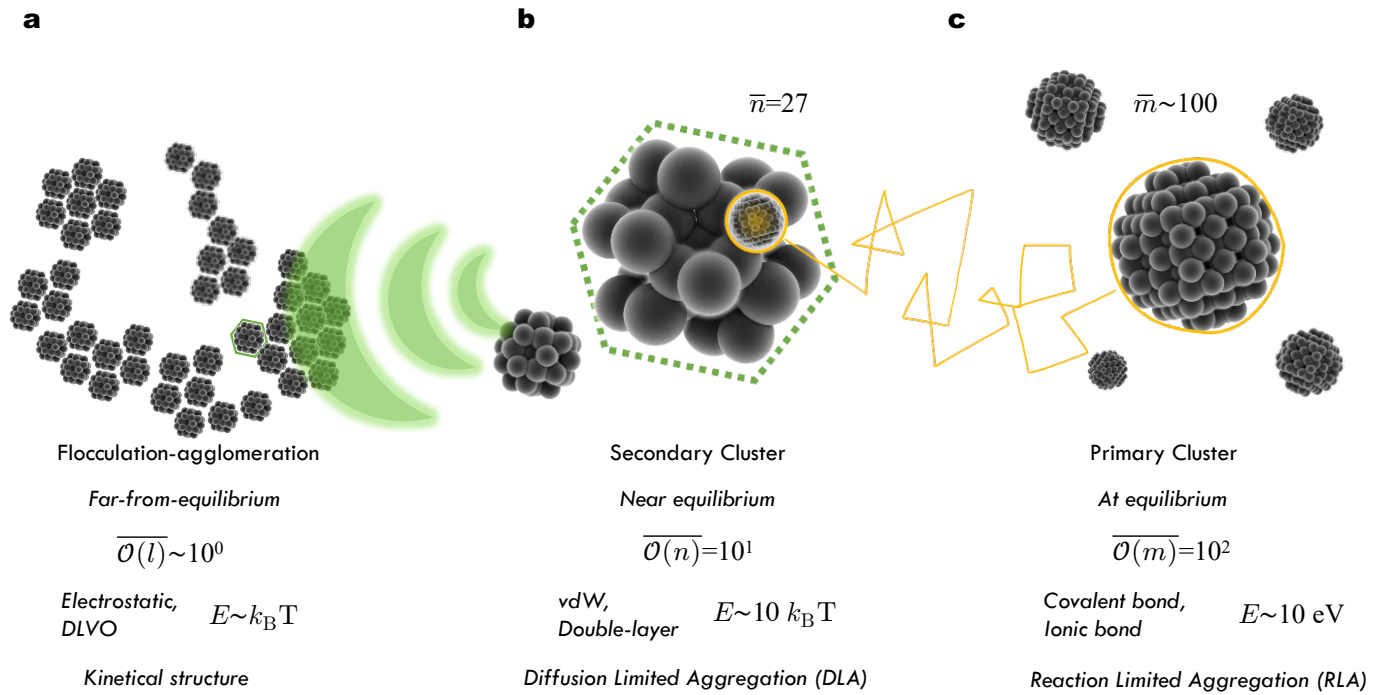

**Fig. S1.** A hierarchical nanoarchitecture concluded in the present study. **a** Flocculation-agglomeration model. Common in kinetical structure observed on a carbon-coated copper microgrid. **b** Secondary cluster with the mean value of aggregation number  $\bar{n} = 27$ . Diffusion Limited Aggregation is in control; that is, the Brownian motion (orange solid line segments represent a zigzag trace) is a key path. **c** Primary cluster with the mean value of  $\text{Ce}^{\text{IV}}$  in a single particle  $\bar{m} \sim 100$ .

## References

- (1) Itoh, T.; Mori, M.; Inukai, M.; Nitani, H.; Yamamoto, T.; Miyanaga, T.; Igawa, N.; Kitamura, N.; Ishida, N.; Idemoto, Y., Effect of Annealing on Crystal and Local Structures of Doped Zirconia Using Experimental and Computational Methods. *J. Phys. Chem. C* **2015**, *119*, 8447-8458.
- (2) Mullica, D. F.; Oliver, J. D.; Milligan, W. O., Cerium trihydroxide. *Acta Crystallographica Section B* **1979**, *35*, 2668-2670.
- (3) Milinski, N.; Ribar, B.; Sataric, M., PENTAAQUATRINITRATOCERIUM(III) MONOHYDRATE,  $\text{Ce}(\text{H}_2\text{O})_5(\text{NO}_3)_3 \cdot \text{H}_2\text{O}$ . *Crystal Structure Communications* **1980**, *9*, 473-477.
- (4) Beineke, T. A.; Delgaudio, J., Crystal structure of ceric ammonium nitrate. *Inorg. Chem.* **1968**, *7*, 715-721.
- (5) Guillou, N.; Auffrédic, J. P.; Louër, D., Synthesis, Crystal Structure, and Thermal Behavior of Cerium(IV) Oxide Nitrate  $\text{Ce}_2\text{O}(\text{NO}_3)_6(\text{H}_2\text{O})_6 \cdot 2\text{H}_2\text{O}$ . *Journal of Solid State Chemistry* **1994**, *112*, 45-52.
- (6) Calvez, G.; Daguebonne, C.; Guillou, O.; Le Dret, F., A New Series of Anhydrous Lanthanide-Based Octahedral Hexanuclear Complexes. *Eur. J. Inorg. Chem.* **2009**, *2009*, 3172-3178.
